# Supplementary material
Source: Springer Nature journal article supplement (https://www.springermedizin.de/resource/supplementary/12885_2011_2816_MOESM6_ESM.pdf/9462072)

Arachidonic acid

PTGS1

PGE2

Androstendione

Estrone

CYP19A1

17 $\beta$ HSD1

Testosterone

Estradiol

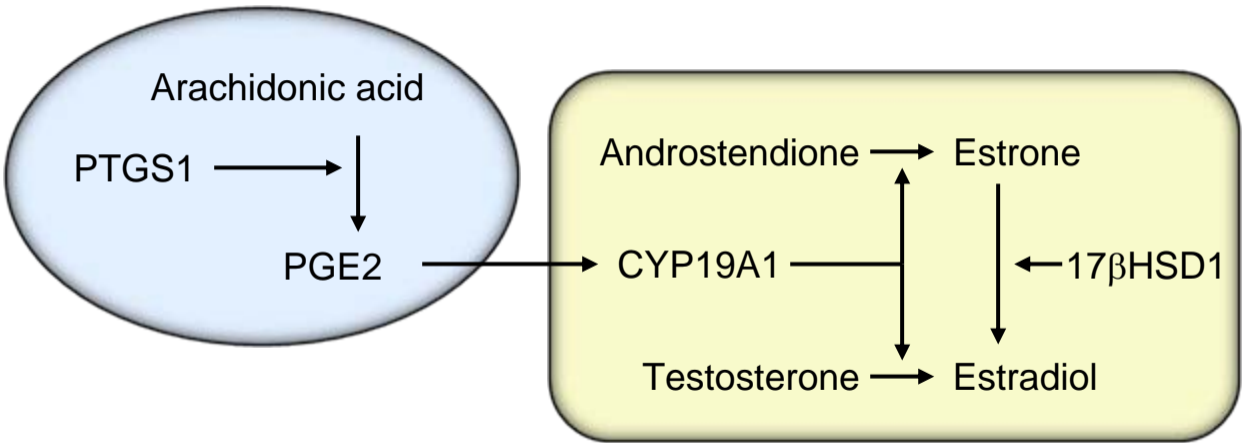

Supplement: MOESM6 [file 9462072]
